RESEARCH ARTICLE

# Chlorella diet alters mitochondrial cardiolipin contents differentially in organs of *Danio rerio* analyzed by a lipidomics approach

Yu-Jen Chao<sup>1</sup>, Wen-Hsin Wu<sup>1</sup>, Maria Balazova<sup>2</sup>, Ting-Yuan Wu<sup>1</sup>, Jamie Lin<sup>3,4</sup>, Yi-Wen Liu<sup>3,4\*</sup>, Yuan-Hao Howard Hsu<sup>1,4\*</sup>

**1** Department of Chemistry, Tunghai University, Taichung, Taiwan, **2** Institute of Animal Biochemistry and Genetics, Centre of Biosciences, Slovak Academy of Sciences, Bratislava, Slovakia, **3** Department of Life Science, Tunghai University, Taichung, Taiwan, **4** Life Science Research Center, Tunghai University, Taichung, Taiwan

\* [dlslys@thu.edu.tw](mailto:dlslys@thu.edu.tw) (YWL); [howardhsu@thu.edu.tw](mailto:howardhsu@thu.edu.tw) (YHH)

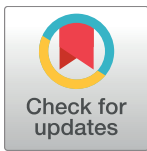

**OPEN ACCESS**

**Citation:** Chao Y-J, Wu W-H, Balazova M, Wu T-Y, Lin J, Liu Y-W, et al. (2018) Chlorella diet alters mitochondrial cardiolipin contents differentially in organs of *Danio rerio* analyzed by a lipidomics approach. PLoS ONE 13(3): e0193042. <https://doi.org/10.1371/journal.pone.0193042>

**Editor:** Qun Chen, Virginia Commonwealth University Department of Internal Medicine, UNITED STATES

**Received:** June 21, 2017

**Accepted:** February 2, 2018

**Published:** March 1, 2018

**Copyright:** © 2018 Chao et al. This is an open access article distributed under the terms of the [Creative Commons Attribution License](https://creativecommons.org/licenses/by/4.0/), which permits unrestricted use, distribution, and reproduction in any medium, provided the original author and source are credited.

**Data Availability Statement:** All relevant data are within the paper and its Supporting Information files.

**Funding:** The work was supported by Ministry of Science and Technology, Taiwan (MOST 105-2113-M-029-009 and MOST 106-2923-M-029-001-MY3) and National Health Research Institutes, Taiwan (NHRI-EX105-10236SC) to YHH, Ministry of Science and Technology, Taiwan (MOST 105-2313-B-029-002 and MOST 106-2313-B-029-002-

## Abstract

The zebrafish (*Danio rerio*) is an important and widely used vertebrate model organism for the study of human diseases which include disorders caused by dysfunctional mitochondria. Mitochondria play an essential role in both energy metabolism and apoptosis, which are mediated through a mitochondrial phospholipid cardiolipin (CL). In order to examine the cardiolipin profile in the zebrafish model, we developed a CL analysis platform by using liquid chromatography-mass spectrometry (LC-MS). Meanwhile, we tested whether chlorella diet would alter the CL profile in the larval fish, and in various organs of the adult fish. The results showed that chlorella diet increased the chain length of CL in larval fish. In the adult zebrafish, the distribution patterns of CL species were similar between the adult brain and eye tissues, and between the heart and muscles. Interestingly, monolyso-cardiolipin (MLCL) was not detected in brain and eyes but found in other examined tissues, indicating a different remodeling mechanism to maintain the CL integrity. While the adult zebrafish were fed with chlorella for four weeks, the CL distribution showed an increase of the species of saturated acyl chains in the brain and eyes, but a decrease in the other organs. Moreover, chlorella diet led to a decrease of MLCL percentage in organs except the non-MLCL-containing brain and eyes. The CL analysis in the zebrafish provides an important tool for studying the mechanism of mitochondria diseases, and may also be useful for testing medical regimens targeting against the Barth Syndrome.

## Introduction

Zebrafish is an established vertebrate model for biomedical research due to its embryo transparency, low-cost maintenance, high similarity to human genetics, and feasibility for drug-screening. Most organs in zebrafish, except those of the reproduction system, start to function before 5 days post fertilization, which facilitates phenotypic manifestation of genetic disorders early in development. The zebrafish disease models of anemia, leukemia, cancer, heart

MY3) to YWL and Slovak Academy of Sciences (SAS-MOST JRP 2016/4) to MB. The funders had no role in study design, data collection and analysis, decision to publish, or preparation of the manuscript.

**Competing interests:** The authors have declared that no competing interests exist.

disorder, muscle disorder and human degenerative diseases have been created [1, 2]. It is noteworthy that the zebrafish has emerged as a model for mitochondrial biology and diseases. The mitochondria were shown to be abundantly distributed at multiple tissues such as the eye, brain, heart and muscle in the developing zebrafish. Human mitochondrial diseases that have been replicated in the zebrafish larvae include those affecting the cardiovascular, nervous, visual, muscular and hematopoietic systems [3–8]. Zebrafish also gains its popularity in the lipid research to tackle the diseases caused by lipid metabolism abnormality [9]. Supplementation of polyunsaturated fatty acids (PUFA) to the zebrafish and the trout can change the phospholipid composition in mitochondria and affect the mitochondrial activity to produce ATP [10, 11].

Chlorella is a popular nutritional supplementation containing more than 60% of PUFA in the total fatty acids content [12]. Active components from the chlorella extracts have been shown to have anticancer activity, [13–15] and anti-inflammation effects [16–18]. The supplemented PUFA can be incorporated into the mitochondrial phospholipids cardiolipin (CL) and alter the fatty acyl chain compositions of CL in H9c2 cells [19]. CL content in mitochondria can fluctuate along with the environmental fatty acid content. Starvation and replenishment of serum have been shown to affect the CL compositions in cancer cell lines [20]. Therefore, supplementation of fatty acids can affect the inner membrane structure of mitochondria and ATP synthesis efficiency through the incorporation of fatty acid into mitochondrial CL.

Mitochondrial activity can be evaluated by quantification of the proton circuits, mitochondrial or cell respiratory control, membrane potential and adenine nucleotides, which provide different perspectives of the mitochondria [21]. CL is a major membrane component critical for the curvature of crista of inner mitochondrial membrane [22, 23]. Mitochondrial dysfunction is related to the errors in quality and quantity of CL compositions, which decrease the efficiency of energy processing. CL(s) containing multiple PUFA are particularly susceptible to ROS-induced oxidation, which causes the inactivation of electron transport complex I, III and IV [24–26]. The correct CL/monolyso-cardiolipin (MLCL) ratio is directly related to the structure and function of mitochondria [27]. Mass spectrometry has proved to be a useful method for the quantification of CL(s) and the determination of CL/ MLCL [28].

The zebrafish has been utilized as a model for studying human Barth syndrome which is caused by the mutation of the CL remodeling enzyme Tafazzin [4, 29]. Moreover, novel hematopoietic function of CL remodeling enzyme Lysocardiolipin Acyltransferase has been discovered based on a zebrafish mutant study [30, 31]. However, the methodology of profiling CL as well as its remodeling in the zebrafish has remain unestablished. In this study, we used the mass spectrometry (MS) approach to demonstrate that the CL profile of the larval zebrafish can be remodeled upon the dietary addition of high-PUFA-containing chlorella. Moreover, the CL and CL/ MLCL profiles for various adult organs have been determined. We showed that brain and eye tissues contained similar CL and CL/ MLCL profiles, which were distinct from those of heart, muscle, liver and ovary. In summary, we have established a lipidomics method to detect the CL remodeling in both larval and adult zebrafish.

## Materials and methods

### Ethics statement

All of the zebrafish-use protocols in this research were reviewed and approved by the Institutional Animal Care and Use Committee of Tunghai University (IRB Approval NO. 105–28).

## Materials

Larval AP100 (<100 microns, Zeigler, U.S.A) was used as standard larval food. NovoBel tropical flakes for aquarium fish (JBL, Germany) was ground and used as standard adult fish food. The chlorella was purchased from D.Y.BIO, Taiwan. Tetramyristoyl cardiolipin standard CL (14:0)<sub>4</sub> was purchased from Avanti Polar Lipids, USA. *Siganus* fish was purchased from local fish market. The pig liver was purchased from local market. Fish oil 1000 mg in softgels was purchased from Kirkland Signature of Costco, US. Thin-layer chromatography (TLC) plate was purchased from Merck, Germany.

## Zebrafish lines and maintenance

Zebrafish (*Danio rerio*) hatched from the same batch of eggs were maintained following standard protocols [32]. The chlorella was ground before chlorella supplementation. The chlorella plus fish oil-supplemented food was prepared by mixing 1 g of chlorella and 0.071 g of fish oil. Nine 15-months old zebrafish were divided into 3 groups, and maintained with designated diets: standard adult fish food, chlorella, and fish oil-supplemented chlorella; for four weeks. Because the experiment of one adult fish in the chlorella treatment failed during lipid extraction process, the mass spectrometry data of six organs from this group were duplicated from two fish. All fish were anaesthetized on ice and weighed, and the adult fish were dissected to collect tissues for weighing and storage at -20 °C prior to experiments. Nine 1-week old larvae were also separated into 3 groups and fed with the designated diet: standard larval fish food, chlorella and fish oil-supplemented chlorella for two weeks before harvest. The fresh *Siganus* fish from the Taiwan Strait was frozen in -20 °C and dissected to acquire organs within 24 hr. after thawing.

## Fatty acid profiling

To analyze the fatty acid compositions of chlorella and fish food, 0.2 g of chlorella or 1 g of fish food was grounded and placed in a glass tube. The samples were added 0.5 ml of 3 M KOH and 2.5 ml MeOH and then sonicated for 30 sec. After adding additional 2 ml of MeOH to maintain the KOH:MeOH = 1:9, the samples were vortexed and heated in water bath at 80 °C for one hour. After the samples cooled down to room temperature, the samples were adjusted to pH 7. The fatty acids were initially extracted by Bligh-Dyer's method and then added 2 ml of hexane for further extraction. The extraction of fatty acids from fish oil was performed according to the same method without Bligh-Dyer's extraction. After the extraction, the hexane was dried under N<sub>2</sub> gas, and the fatty acids were resuspended by ACN:IPA:DDW = 65:30:5 for mass spectrometry analysis.

## Lipid extraction

The total lipids in the collected tissues from zebrafish were extracted by the Bligh-Dyer's method [33]. Before extraction, tissues were homogenized by 2-ml Dounce tissue grinder in 1 ml methanol. The internal standard, 125 ng tetramyristoyl cardiolipin CL(14:0)<sub>4</sub>, was then added to the tissue sample. The homogenized tissue was collected, and the residual tissue on the grinder was washed off with 1 ml MeOH. A total of 2 ml tissue sample in MeOH was transferred to a glass tube. After pulse sonication by 80W UP-80 ultrasonic processor (CT Chrom-Tech, Taiwan) for 2 min on ice, 1 mL of dichloromethane was added to samples and vortexed for 10 min. Then 1 ml of dichloromethane and 1 ml of distilled deionized water were added to samples and vortexed for 10 min. The lower phase in the glass tube was collected after centrifugation at 3000 rpm for 5 min.

### Thin-layer chromatography

TLC was performed on a 20 cm × 20 cm sheet coated with thin layer of silica gel. The cellulose paper was placed into the closed TLC chamber with 98 ml of mobile phase (CHCl<sub>3</sub>:MeOH:HAc = 65:25:8) for one hour. The lipid extracts from the organs were dissolved in 200 μl of chloroform and MeOH in 2:1 ratio. The concentration of the Pi in each samples were determined by the phosphate quantification test and UV absorbance spectrometry at 830 nm. A total of 8 μg phosphorous of the lipid extracts were spotted onto the TLC plates. On the spotted plate, the heart and muscle samples contain only 1.15 μg and 1.8 μg of phosphorous, respectively. The TLC plates were then placed vertically in the TLC chamber for 2 hours, and then dried and developed in iodine vapor for 5 min.

### Phosphate quantification

Each phospholipid spot on the TLC plate was scratched down and put into a glass tube. After adding 200 μl of H<sub>2</sub>SO<sub>4</sub>:HClO<sub>4</sub> = 9:1, the samples were incubated at 200 °C for 30 min. The samples were allowed to cool down for 10 min at room temperature and added 4.8 ml of solution, containing 500 ml of 0.26% (NH<sub>4</sub>)<sub>6</sub>Mo<sub>7</sub>O<sub>24</sub>·4H<sub>2</sub>O: 22 ml of ANSA. ANSA stock solution is composed of 16 g K<sub>2</sub>S<sub>2</sub>O<sub>5</sub>, 0.252 g C<sub>10</sub>H<sub>9</sub>NO<sub>4</sub>S and 0.5 g Na<sub>2</sub>SO<sub>3</sub> in 100 ml. The samples were incubated at 105 °C for 30 min, cooled down and then gently centrifuged at 500×g for 2 min. The Pi of the phospholipids that reacts with ammonium heptamolybdate can form molybdenum blue, which was then detected by absorbance spectrometry at 830 nm.

### Gene expression evaluated by real-time quantitative PCR

Zebrafish organs were added 1 ml of TRIZOL reagent, homogenized and then sonicated on ice for 1 min. The samples were added 200 μl of chloroform for phase separation, and 500 μl of upper phase was collected to mix with 500 μl isopropanol. The mRNA was purified from the collected precipitate. The cDNA synthesis Kit from Bio-Rad was utilized for the mRNA reverse transcription. The quantitative PCR mix contained 50 ng of cDNA, 10 pmole of forward primer, 10 pmole of reverse primer and 10 μl of iQ™ SYBR Green Supermix (Bio-Rad) in a 20 μl reaction. The primers of tafazzin (NM\_001001814.1) are forward 5′-CCT CGA GTA GGA CAG CGG AT-3′ and reverse 5′-GCA TTT CCG TCG GAT TCG TG.-3′. The primers of phospholipase A<sub>2</sub> (group VI (pla2g6), NM\_213097.2) are forward 5′-AAA GCC CTG ATG GTG TTT GG-3′ and reverse 5′-CAG CGT TCG ACA CCT ACA CTA-3′. The primers of GAPDH (NM\_001115114.1) are forward 5′-GCA ACA CAG AAG ACC GTT GA-3′ and reverse 5′-GCC ATC AGG TCA CAT ACA CG-3′. Real-time quantitative PCR was performed on a MiniOpticon Real-Time PCR System (Bio-Rad, Hercules, CA). The cycling conditions were 180 sec at 95°C for initial polymerase activation and 40 cycles of 15 sec at 95°C and 90 sec at 60°C.

### MS analysis

The extracted total lipids from zebrafish's tissues were dried under nitrogen gas and re-dissolved in 400 μl of acetonitrile/2-propanol/H<sub>2</sub>O (65:30:5) immediately. The samples were analyzed by LC/MS Ion-Trap (Bruker Corporation). A total of 50 μl dissolved sample was injected through the autosampler. HPLC mobile phases contained solution A: ACN:H<sub>2</sub>O (60:40), 10 mM ammonium formate, 0.1% formic acid and solution B: IPA:ACN (90:10), 10 mM ammonium formate, 0.1% formic acid[34]. Gradient was from 60% solution A to 100% solution B in 25 min and maintained 100% solution B until 45 min in an Acclaim RSLC 120 C18 2.1 mm x 100 mm 2.2 μm column (Thermo) at a flow rate of 0.2 mL/min at 55 °C. Data were further

analyzed by Bruker DataAnalysis (ver.4.1). The extract ion current (XIC) of each cardiolipin species was quantitated by their relativity of XIC to internal standard. Standard curve of XIC detector response versus content of cardiolipin standard is provided in [S1 Fig](#).

## Results

### The CL profile of the larval zebrafish is altered by a chlorella diet

To examine the CL contents in the larval zebrafish, and to test whether the CL contents in the larval fish could be changed by the chlorella diet, 9 newly-hatched fish were collected and separated into three groups for feeding starting at the stage of 1-week post fertilization. The three groups were fed with standard larval food, chlorella, and chlorella supplemented with fish oil, respectively, for two weeks. Total lipids in the 3-week old larval fish were extracted by Bligh-Dyer's extraction method and analyzed by LC-MS. The CL profile in larval fish fed with standard larval diet contains multiple groups of CL species, and the CL groups display normal distribution on the mass spectrometry spectrum ([Fig 1](#)). Based on the mass of the molecule, we were able to calculate the chain length and double bond number of CL. The C72 group shows the strongest intensity with 37.8%, and the CL 1449.7 m/z is the main species under standard larval diet. In the chlorella diet, we found that the main CL group shifts to C74 group, and the species 1475.7 m/z becomes the dominant CL species with 28.7%. C72 shows a major 9.7% decrease, and C76 and C78 show 5.8% and 3.6% increases of CL respectively. In the larval fish fed with chlorella, the fatty acyl chains in CL(s) shift towards higher chain length, containing more unsaturated species, suggesting that the PUFA in the chlorella diet have been incorporated into mitochondrial CL and are involved in the CL remodeling. The fish oil-supplemented chlorella group did not show significant differences as compared to the chlorella-fed fish group ([S2 Fig](#)). The fatty acid compositions were different among the fish food, the chlorella and the fish oil. ([Fig 2](#)). The fish oil is mainly composed of EPA and DHA. The fish food contains 16-carbon and 18-carbon fatty acids, with lower amounts of EPA and DHA. Chlorella contains high percentage of 18:0 and 18:1 fatty acids, and versatile long chain fatty acids. This indicates that the long chain fatty acids in versatile lipid forms can be an important factor to change the CL profile in fish.

### CL profiling in the adult zebrafish

Three zebrafish were sacrificed and the organs of the fish were collected. Phosphate concentration in the lipid extract of each organ was determined by the phosphate test. Among these tissues, brain and liver tissues are relatively soft, which may increase the efficiency of lipid extraction. The brain and the ovary contained more phospholipids, and incomplete homogenization of the muscle tissue led to low yield of the lipid extraction. To estimate the quantity of phospholipids, the lipid extracts were spotted onto the TLC plate for the separation of phospholipids including CL, phosphatidylglycerol (PG)/phosphatidylethanolamine (PE)/MLCL, (phosphatidylinositol) PI/phosphatidylserine (PS) and phosphatidylcholine (PC). ([Fig 3A](#)). PC was the main phospholipids in all tissues. CL was quite hydrophobic and traveled faster than other phospholipids, and its quantity was very low in the ovary. It is noteworthy that CL and PC were the most abundant phospholipids present in the heart tissue. We further quantitated all of the separated phospholipids on the TLC plate ([Fig 3B](#)). Heart tissue contains CL in 13% of total phospholipids and 250 pmole/mg tissue, indicating high amount of mitochondria in the heart ([Fig 3C](#)). All other tissues contain CL in less than 4% of total phospholipids.

In mammals, CL has been shown to remodel differently in various cellular or animal models. In the MS analysis, detected CL species can be normally distributed as we discovered in the larvae zebrafish. Alternatively, CL can be restricted to one or two dominant symmetrical

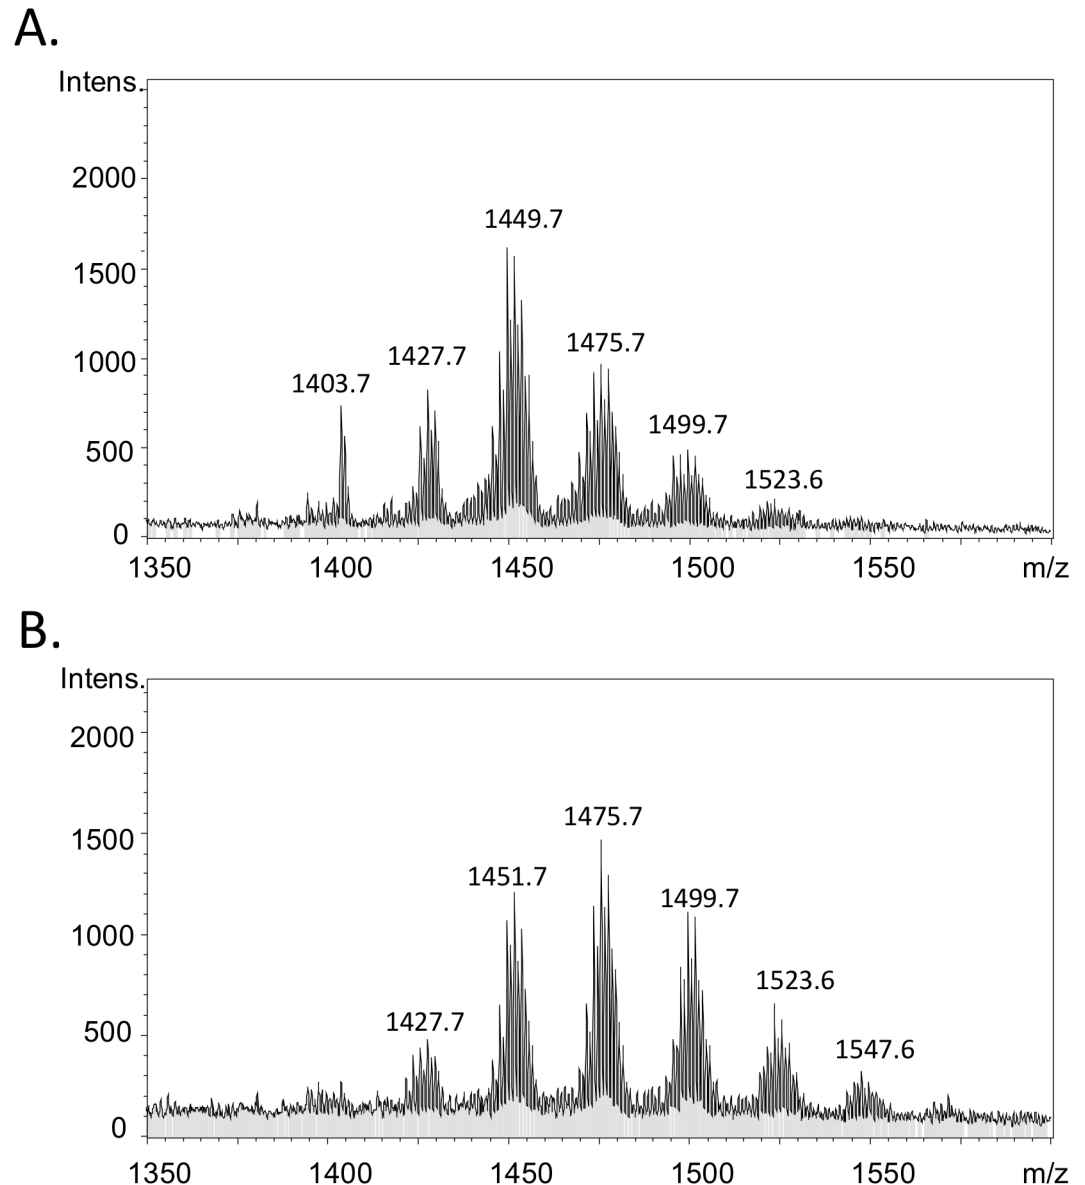

**Fig 1. Mass spectrum of cardiolipins in the larval zebrafish.** Larval fish (one-week old) was maintained with normal diet (A) and chlorella diet (B) for two weeks. After total lipid extraction, the cardiolipin was analyzed by LC-MS.

<https://doi.org/10.1371/journal.pone.0193042.g001>

species, such as the CL found in pig liver (S3A Fig). The dominant  $m/z = 1448$  in the mass spectrum of pig liver belongs to a symmetrical CL  $(18:2)_4$  species. To confirm that the CL profile of zebrafish larvae was not due to the feeding diet, we also analyzed the CL profile of the *Siganus* fish directly from ocean (S3B Fig). The CL species of *Siganus* muscle were distributed into 6 to 7 groups, similar to those detected in the larval zebrafish. Profiling the pattern of CL distribution in different organs of zebrafish, a model for human mitochondrial diseases, can benefit the analysis of effects of drug or nutrition supplementation. However, the distribution profiles of CL in adult zebrafish organs have not been reported. We hypothesized that the CL profile in different organs of zebrafish are disparate. To evaluate this hypothesis, the fish were maintained to fifteen-months old and kept with standard adult food for four weeks. The fish was sacrificed to acquire the brain, eyes, heart, muscle, liver and ovary tissues. The total lipids



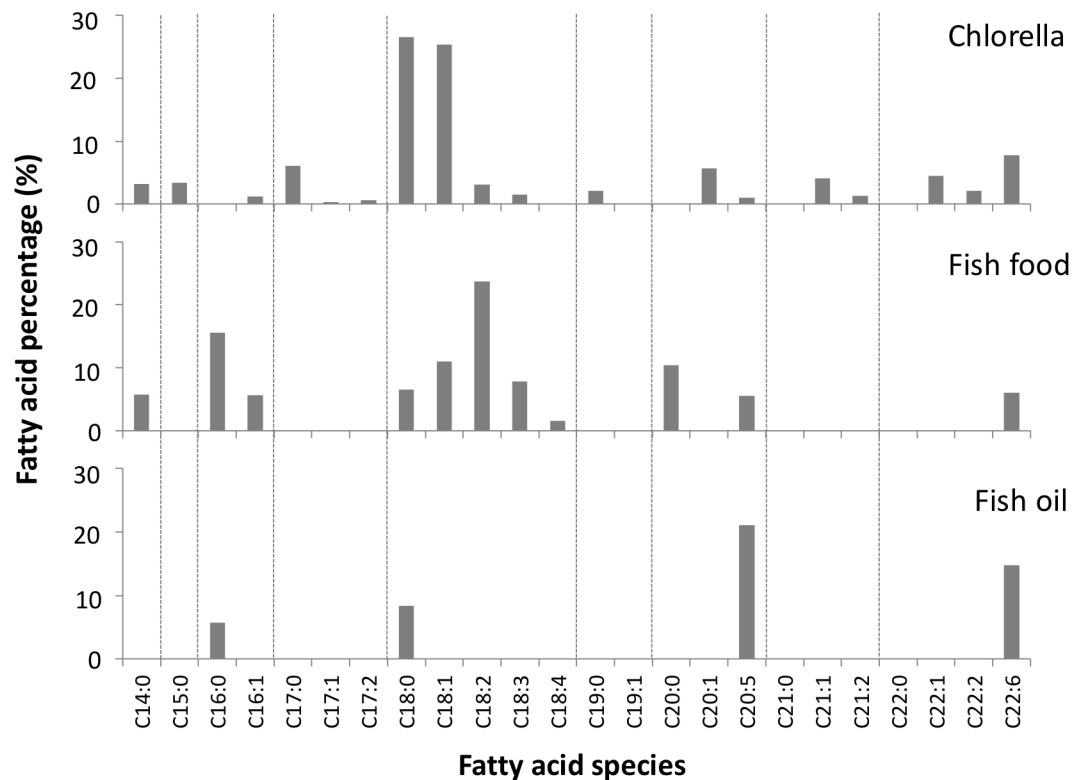

**Fig 2. Fatty acid compositions of fish food and supplements.** The fish food, chlorella and fish oil were saponified by 1M NaOH. The fatty acids were extracted by the Bligh-Dyer method and analyzed by LC-MS.

<https://doi.org/10.1371/journal.pone.0193042.g002>

in each organ were extracted and analyzed by MS (Fig 4). The results displayed 7 major groups of CL in the brain and eyes. Among them, the major C72, C74 and C76 groups accounted for 24.5%, 25.6% and 20.9% of the total CL in the brain; and 24.4%, 24.3% and 17.3% in eyes. Compared to the CL profile in the brain and eyes, the CL profile in the heart and the muscle were more concentrated on C72 and C74 groups. C72 and C74 groups accounted for 37.7% and 30.4% of the total CL in the heart; and for 32.0% and 32.6% in the muscle. The CL species in these two organs shifted to lower mass on the spectrum, indicating the substitution of more unsaturated CL. Our results showed similar distribution patterns between the brain and eyes, and between the muscle and the heart, suggesting similar mitochondrial function and activities in these two groups of organs. In the liver, C72, C74 and C76 groups accounted for 26.4%, 30.9% and 19.6% of total CL, and for 22.2%, 28.4% and 22.5% in the ovary.

### Quantification of CL species in the organs of adult zebrafish

The mass spectra of the brain and eye tissues are drastically different from those of the heart and muscle tissues, suggesting that these two categories of organ tissues contain distinct compositions of mitochondrial membrane phospholipids, which likely lead to different mitochondrial activities besides energy conversion, such as apoptosis signaling and production of reactive oxygen species. Quantification of CL species assists the analysis of the changes of each individual CL species. Therefore, we semi-quantified the CL and MLCL species by the relative extracted ion current (XIC) to the externally added CL (14:0)<sub>4</sub> internal standard (S4 Fig). Subsequently, we compared the percentages of CL and MLCL in the brain with those in the heart (Fig 5). The C72, C74 and C76 groups are three major groups of CL

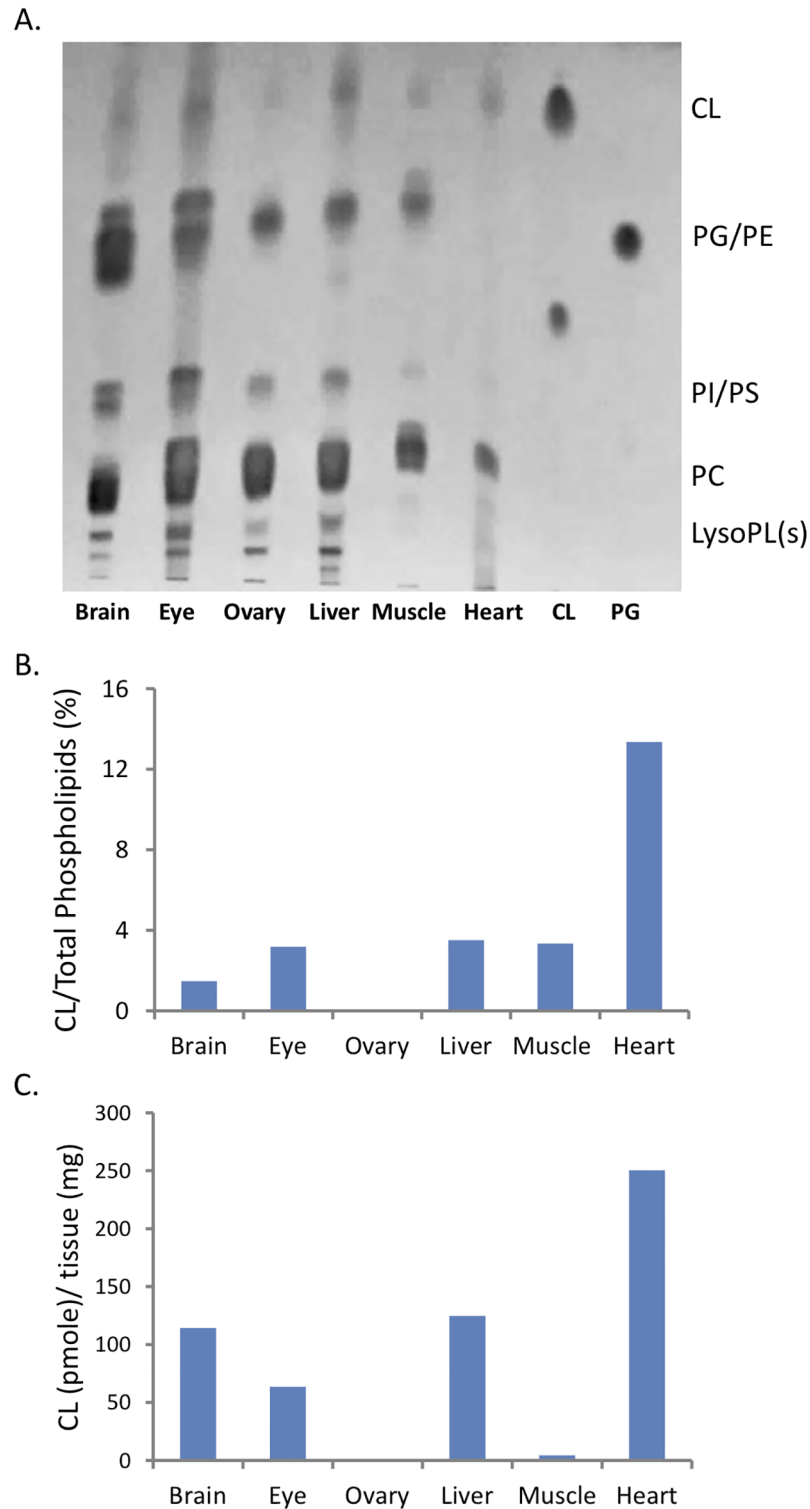

**Fig 3. Separation and quantification of zebrafish phospholipids on TLC.** (A) The phospholipids in six organs of zebra fish were separated on a TLC plate. The phospholipids equivalent to 8 µg of Pi from the brain, eye, ovary and liver were loaded into the first four lanes; and those equivalent to 1.8 and 1.15 µg of Pi from the muscle and heart samples, respectively, were loaded into next two lanes. The last two lanes were the phospholipid standards, CL and PG. (B) The ratios of the CL to total phospholipids were calculated based on the quantitated phosphate level on the TLC spots. (C) The quantities of CL in six organs were calculated based on ratios of CL on TLC plate.

<https://doi.org/10.1371/journal.pone.0193042.g003>



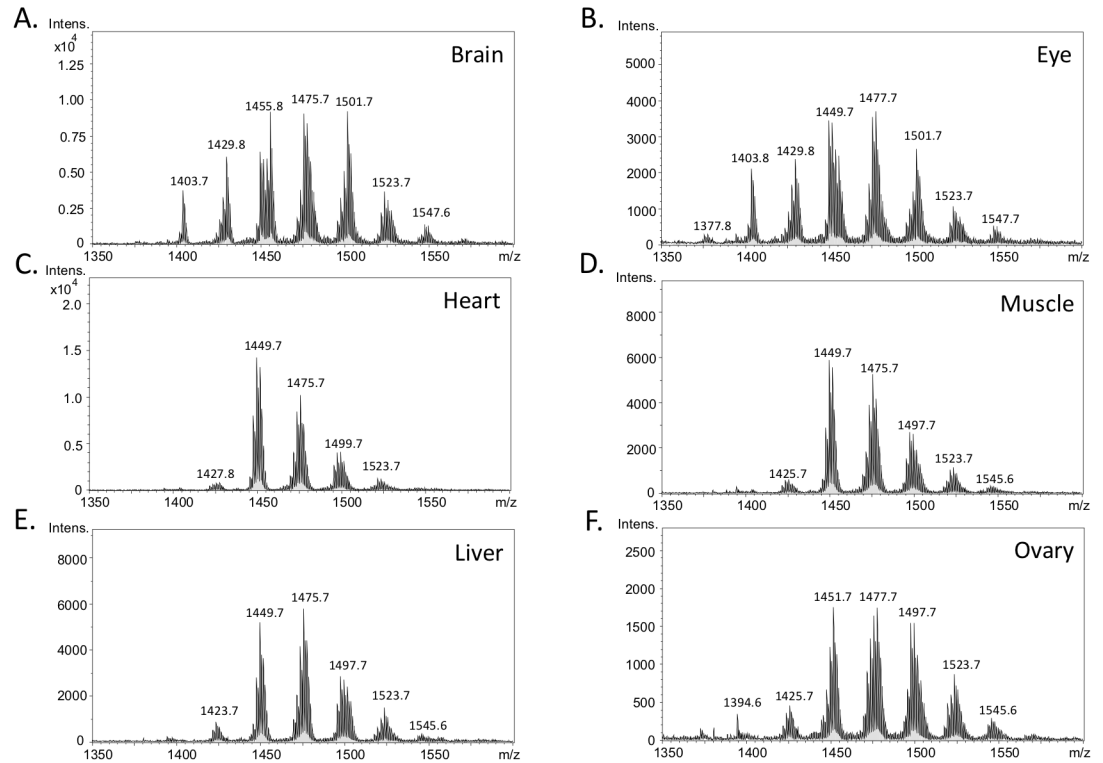

**Fig 4. Mass spectrum of cardiolipins in different organs of the adult zebrafish.** Adult female fish (fifteen-months old) was maintained with normal diet for four weeks. The lipids in various organs, including those of (A) brain, (B) eye, (C) heart, (D) muscle, (E) liver and (F) ovary, were extracted and cardiolipins were analyzed by LC-MS.

<https://doi.org/10.1371/journal.pone.0193042.g004>

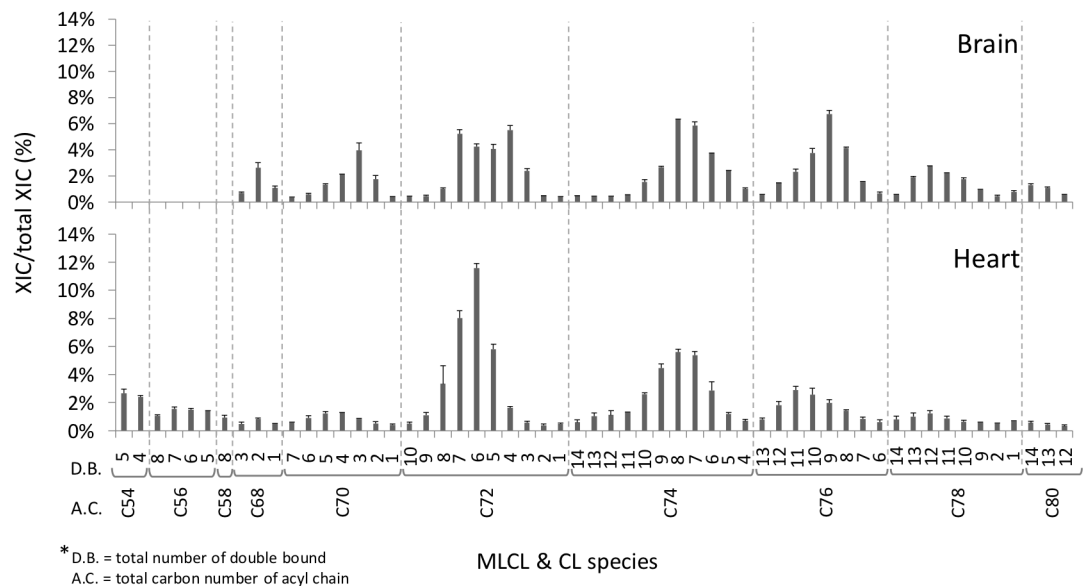

**Fig 5. Percentage of CL and MLCL species in the brain and the heart.** Adult female fish (fifteen-months old) was maintained with normal diet for four weeks. After total lipid extraction, the cardiolipin was analyzed by LC-MS. Total XIC is defined as the XIC of all detected CL and MLCL species.

<https://doi.org/10.1371/journal.pone.0193042.g005>

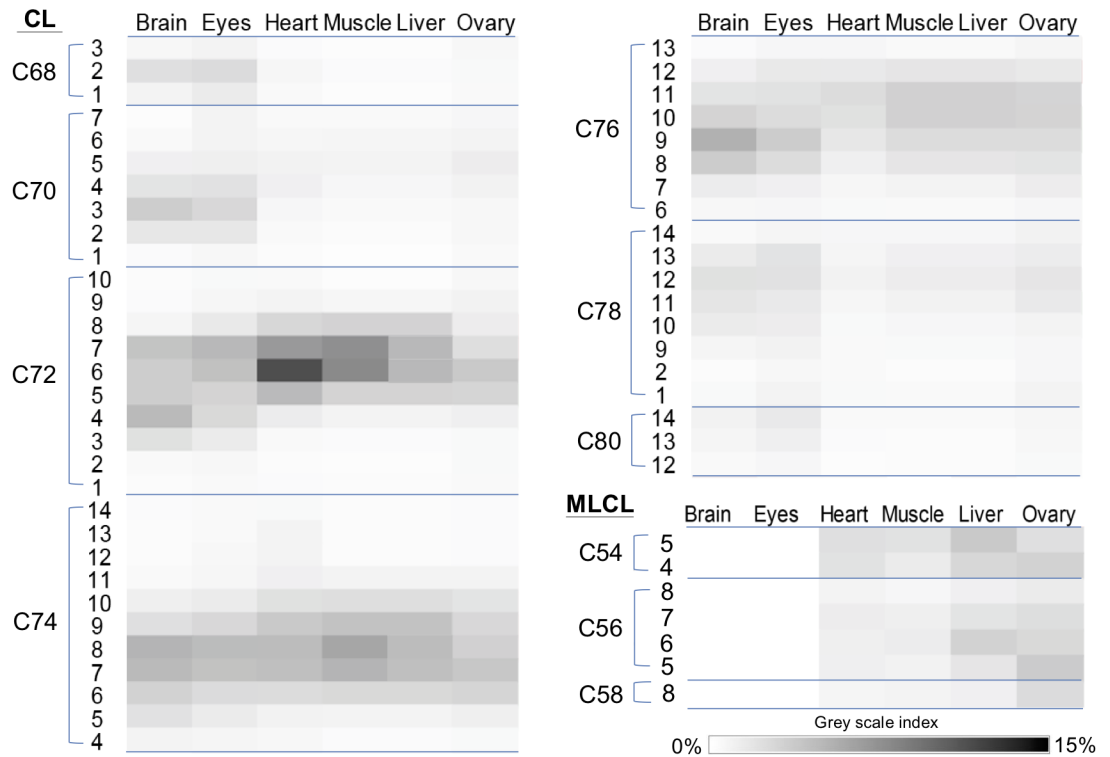

**Fig 6. The grey scale map of the percentage of CL and MLCL species in the organs of adult fishes.** The percentage of each CL and MLCL species was displayed according to the grey scale index, which is the ratio of XIC to total XIC as detected by LC-MS.

<https://doi.org/10.1371/journal.pone.0193042.g006>

in the brain. In the heart, the C72 group is the dominant group while C72:5, C72:6 and C72:7 are the top three CL species, suggesting that the heart requires these CL species to maintain the energy production of mitochondria. A higher percentage of CLs in C72, C74 and C76 groups tended to have 5 to 8 of double bonds instead of 1 to 4 double bonds. The C54, C56 and C58 groups belong to the MLCL, which cannot be detected in the brain tissue. In the heart tissue, the abundant CL species are C54, C56 and C58 MLCL and C72, C74 and C76 CL, suggesting that the hydrolysis and reacylation reaction of CL and MLCL dominantly utilizes fatty acids with 18 carbons.

To have an overview of the CL and MLCL profiles of the organs of the adult fish, the percentages of CL and MLCL species were expressed on the gray scale map (Fig 6). C72:6 and C72:7 are the two abundant species in C72 group. This indicates that 18:1 and 18:2 are the two most abundant fatty acyl chains of CL in zebrafish. It is interesting to note that no MLCL was detected in either brain or eye tissue, and the percentages of MLCL in liver and ovary are higher than those in other tissues. These effects on CL degradation may be caused by complex reasons involving the regulation of CL remodeling enzymes.

It is possible that high percentages of MLCL are caused by either a lack of Tafazzin or high expression of iPLA<sub>2</sub>. Therefore, we examined the gene expression of *tafazzin* and *pla2g6* in various adult organs (Fig 7). The expression of *tafazzin* was substantially lower in tissues of heart, muscle, liver and ovary than that in the brain and eye tissues, indicating that Tafazzin is a key enzyme for regulating the MLCL concentration. The expression levels of *pla2g6* and *tafazzin* however seemed to follow the similar trend, suggesting that the hydrolysis of CL are tightly accompanied with the reacylation of MLCL in adult zebrafish organs. It remains unclear

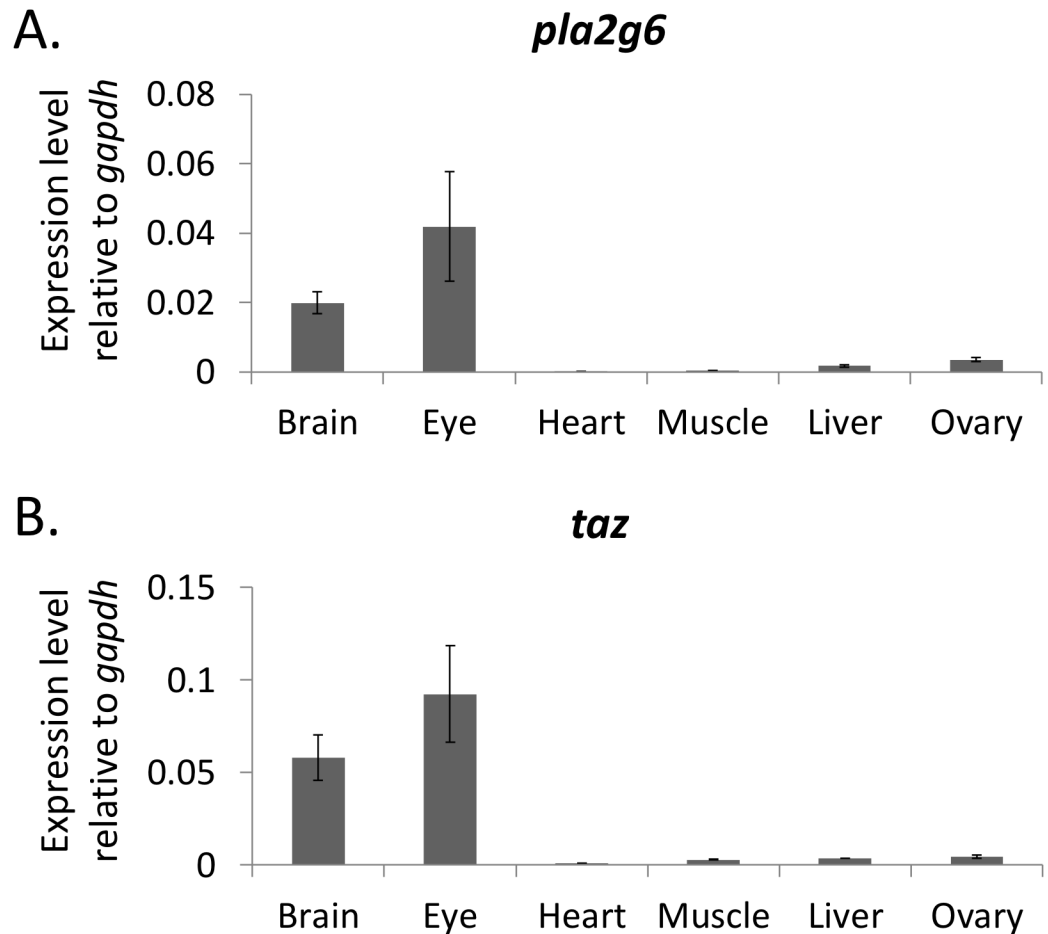

**Fig 7. *tafazzin* and *pla2g6* gene expression in zebrafish organs.** The gene expression of (A) *tafazzin* and (B) *pla2g6* are examined by RT-qPCR. The heat map representing *gapdh* is used as the reference gene.

<https://doi.org/10.1371/journal.pone.0193042.g007>

whether unidentified mechanisms of CL hydrolysis might exist in MLCL-containing organs including heart, muscle, liver and ovary.

### Chlorella diet induced changes of CL species in the adult zebrafish

While the chlorella diet led to changes of CL profiles in the larval fish, we further tested whether this feeding effect could also be detected in the adult zebrafish organs. Based on the differential distribution patterns of CL in different organs, it is hypothesized that chlorella diet may cause differential effects on the CL profiles in various organs. To examine the differential effects of PUFA-abundant chlorella diet on mitochondria, the fifteen months old adult fish was maintained with chlorella diet for four weeks. Total lipids in the six isolated organs were extracted by Bligh-Dyer's extraction method and analyzed by LC-MS (Fig 8). In the group of chlorella-supplemented diet, the C72 and C74 CL showed an increase of percentage on the species of saturated acyl chains, particularly C72:4, which is the symmetrical CL(18:1)<sub>4</sub> in the brain and eye tissues. The major CL changes of heart and muscle are localized in the C72 group, which demonstrates a reverse trend of changes compared to the brain and eyes. The percentages of C72:7, C72:8 and C72:9 were elevated up to 4% to decrease the saturation of CL fatty acyl chains, suggesting an incorporation of PUFA into the heart and muscle tissues. The

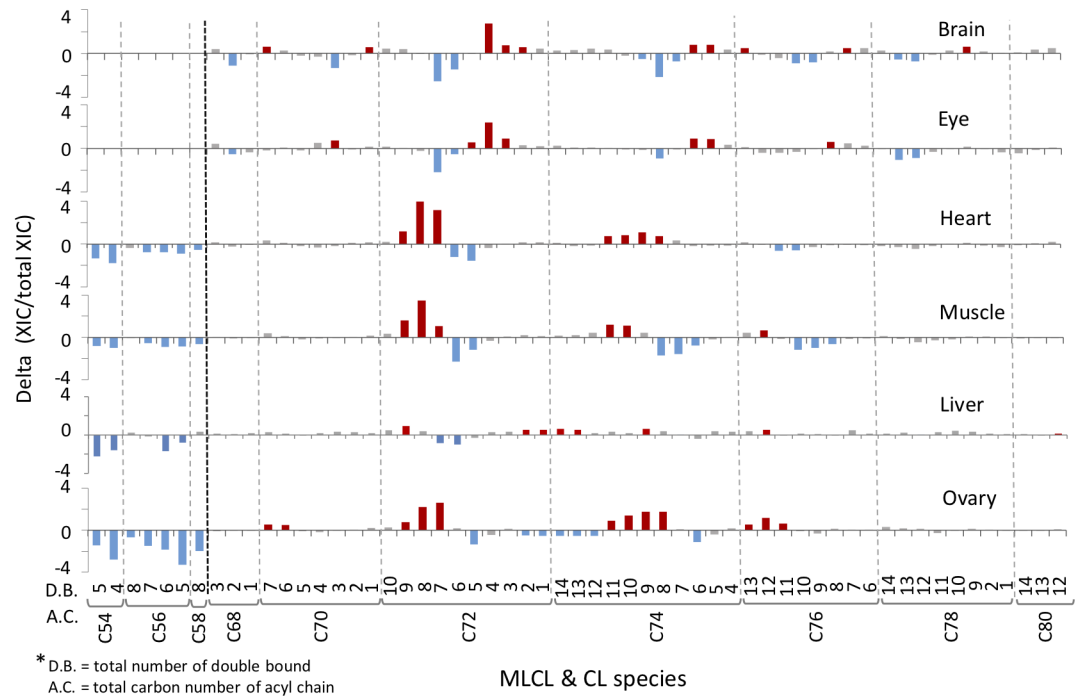

**Fig 8. Chlorella induced changes of CL and MLCL contents in the organs of adult zebrafish.** Adult female fish (fifteen-months old) was maintained with chlorella diet or control normal diet for four weeks. The lipids in each organ were extracted, and cardiolipins were analyzed by LC-MS. Delta (XIC/total XIC) indicates the percentage change for each CL or MLCL species, between the chlorella diet and the control normal diet treatments. The red and blue bars indicate increased and decreased percentages, respectively.

<https://doi.org/10.1371/journal.pone.0193042.g008>

CL profile of the liver is relatively less influenced by the intake of chlorella. The ovary presents an increase of highly unsaturated CL and a decrease of MLCL, suggesting a reacylation of MLCL induced by the chlorella intake.

Reacylation of MLCL and hydrolysis of CL can change the ratio of MLCL to CL. MLCL/CL is an important index to evaluate the status of CL in the organs (Fig 9). As we have seen in the percentage changes, chlorella diet results in a 75% drop in the MLCL/CL ratio. The heart, muscle, and liver all show about 50% decrease of the MLCL/CL ratio, indicating that chlorella diet significantly increases the CL content and decreases the MLCL content. Interestingly, MLCL were shown to be absent in brain and eyes, either with standard food or with chlorella diet.

## Discussion

Research evidences have shown that exogenous fatty acids can alter the CL contents of the palmitate-induced cardiac myocyte during apoptosis [35, 36] or the PUFA-supplemented H9c2 cardiac myoblast [37]. Similarly, CL alteration effects can also be observed in the cardiac mitochondria in rats, when DHA was supplemented in diet [38]. Chlorella has been a commercially available nutritional supplement which contains abundant diverse PUFA and long chain fatty acids. The PUFA is regarded beneficial for preventing cardiovascular diseases. In our study, chlorella diet has a significant effect on changing the CL profile, in both larval and adult zebrafish. For showing the chlorella feeding effect on the CL profile of adult organs, we illustrated the percentage changes of CL upon chlorella feeding on a heat map (Fig 10). Two significant effects can be clearly observed on this heat map. The first effect is the increase of C72:8 CL in the muscle and heart tissues. This CL (18:2)<sub>4</sub> species is a symmetrical CL, which has been an

# MLCL/CL

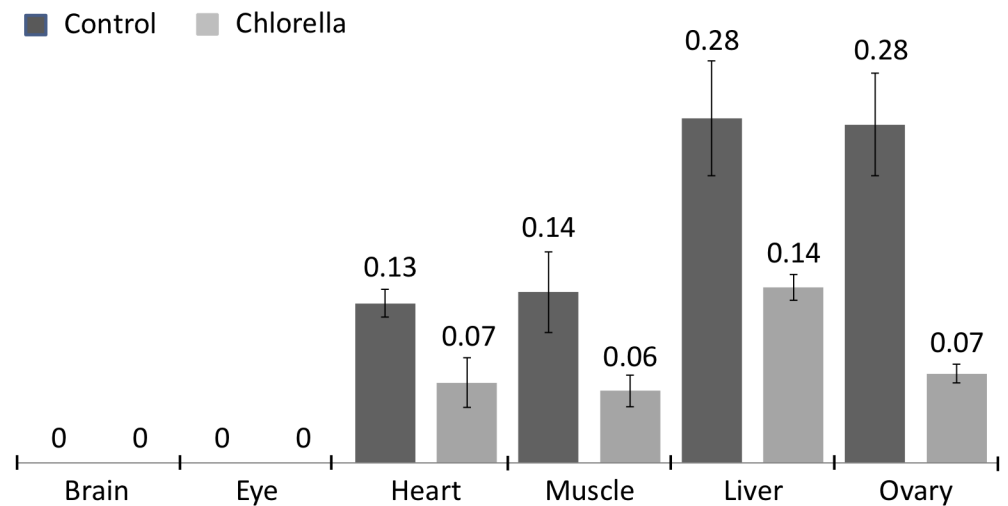

**Fig 9. The effects of chlorella diet on MLCL and CL.** Organs of the adult zebrafish were harvested after four weeks of normal and chlorella diet. The ratio of MLCL to CL is calculated by the ratio of their XIC extracted from the mass spectrum.

<https://doi.org/10.1371/journal.pone.0193042.g009>

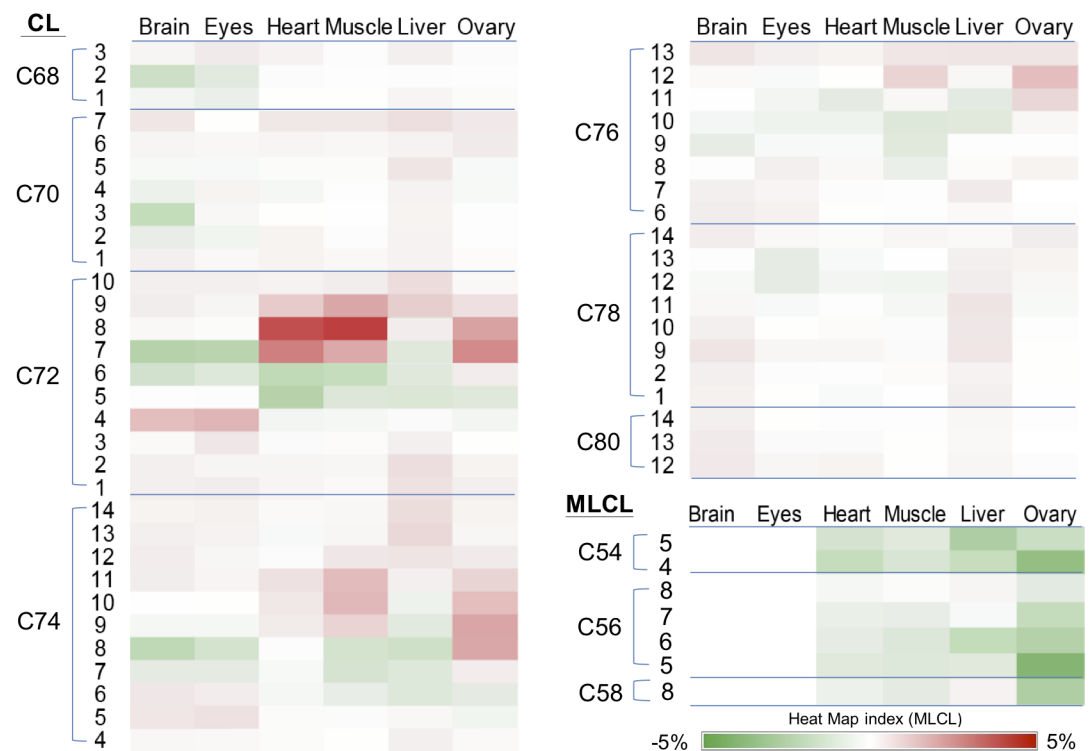

**Fig 10. The heat map representing changes of CL and MLCL species in the organs of zebrafish.** The percentage change indicates the changes between chlorella diet and the control diet, and is displayed according to the heat map index. Green indicates decreases of CL percentages; Red indicates increases of CL percentages.

<https://doi.org/10.1371/journal.pone.0193042.g010>

important indicator of CL maturation. The symmetrical CL dominates the heart and muscle tissues of mammals. The CL species in heart and muscle also shifted from less unsaturated CL to highly unsaturated CL for at least 2 double bond differences in C72 and C74 groups. In our study using the teleostean fish model, it shows that the daily nutrition can affect the remodeling of mitochondrial phospholipids in the heart and the muscle. The second effect of chlorella diet is the decrease of MLCL in the heart, the muscle, the liver, and particularly the ovary. MLCL has been shown as an improper form of CL in the patients of Barth syndrome [39, 40]. Accumulation of MLCL caused by the tafazzin mutation can decrease the function of mitochondria [41–43]. We found that chlorella diet can drastically decrease the content of MLCL, implicating a potential beneficial effect of chlorella-supplemented diet, which is worthy of further investigation.

The average body weight of the adult female zebrafish used in the experiments was 1.8 g, and each fish was fed approximately 5 mg of food per day. The flake fish food and the chlorella contain 8.3% and 11.5% of fats respectively. Therefore, each adult fish ingested approximately 0.23 mg/g body weight/day of fats in the control group, and 0.32 mg/g body weight/day of fats in the chlorella treatment group. Among the organs of an adult fish, the heart contains 0.4  $\mu\text{g}$  of CL, the liver contains 2.4  $\mu\text{g}$  of CL, and two eyes contain 0.7  $\mu\text{g}$  of CL. Overall, we estimate that 500  $\mu\text{g}$  of fats per day, in two weeks, is enough to lead to profile changes in 0.4–2.4  $\mu\text{g}$  of CL contained in various zebrafish organs.

Albeit being functionally distinct organs, the brain and eyes share similarities in the CL profile. Specifically, both organs do not contain any detectable MLCL by MS analysis, indicating that the mitochondria in these two organs only contain CL. While the chlorella diet triggered the CL remodeling in the brain and eye tissues, still no MLCL can be detected during the remodeling process. The high expression level of *tafazzin* in the brain and eyes suggests that the reacylation of MLCL to CL is active in these organs (Fig 6), thus, preventing the accumulation of MLCL. Alternatively, lyso-cardiolipin acyl-transferase (ALCAT1; LCLAT1) has been shown to be responsible for the re-acetylation of MLCL [44], and this gene also exists in zebrafish. This zebrafish homolog of ALCAT1 has been shown related to the development of hematopoietic and endothelial lineages [45]. Because the levels of *tafazzin* and phospholipase expressions varied among organs, LCLAT1 may provide an alternative mechanism of CL remodeling in the *tafazzin*-deficient tissues.

Both the heart and the muscle require large amount of energy processing and high mitochondrial activity. Cardiolipin has been recognized as an oxidative target in the heart of the aged rat [46, 47]. We found that the chlorella diet drastically increased the symmetrical CL in the heart and muscle tissues, which potentially enhance the mitochondrial activity. The induced CL remodeling may reduce the accumulation of the oxidized fatty acid in heart. The CL profile of the ovary seems to benefit most from the feeding of chlorella. Acylation of MLCL actively synthesizes new highly unsaturated CL in the ovary to decrease the total quantity of MLCL.

## Supporting information

### S1 Fig. Standard curve of TIC detector response versus content of cardiolipin standard.

The quantification of 2.5 ng, 5 ng, 10 ng, 20 ng and 40 ng of the CL standards were triplicated and the results were evaluated by linear regression.

(DOCX)

### S2 Fig. Cardiolipins in the larval zebrafish after being treated with fish oil-supplemented chlorella diet.

Larval fish (one-week old) was maintained with fish-oil supplemented chlorella diet for two weeks. The spectrum of cardiolipins in larval zebrafishes (A) and the percentage of CL and MLCL species (B) were analyzed by LC-MS. Total extracted ion current (XIC) is the

XIC of all detected CL and MLCL.  
(DOCX)

**S3 Fig. Mass spectrum of cardiolipins in the pig liver and the siganus muscle.** The total lipids in the pig liver (A) and the siganus muscle (B) were extracted by Bligh/Dyer's method. The cardiolipin of the lipid extract was analyzed by Ion trap MS.

(DOCX)

**S4 Fig. Percentage of CL and MLCL species in various organs.** Adult fish (fifteen-months old) was maintained with normal diet for four weeks. After total lipid extraction, the cardiolipin was analyzed by LC-MS. Total extracted ion current (XIC) is the XIC of all detected CL and MLCL species.

(DOCX)

## Acknowledgments

This work was supported by Ministry of Science and Technology, Taiwan (MOST 105-2113-M-029-009 and MOST 106-2923-M-029-001-MY3) and National Health Research Institutes, Taiwan (NHRI-EX105-10236SC) to YHH, Ministry of Science and Technology, Taiwan (MOST 105-2313-B-029-002 and MOST 106-2313-B-029-002-MY3) to YWL and Slovak Academy of Sciences (SAS-MOST JRP 2016/4) to MB. We would like to thank Hsin-Yu Hou for the maintenance of the zebrafish stock.

## Author Contributions

**Conceptualization:** Yi-Wen Liu, Yuan-Hao Howard Hsu.

**Data curation:** Yu-Jen Chao, Maria Balazova, Ting-Yuan Wu, Jamie Lin, Yi-Wen Liu, Yuan-Hao Howard Hsu.

**Formal analysis:** Wen-Hsin Wu, Maria Balazova, Yuan-Hao Howard Hsu.

**Funding acquisition:** Maria Balazova, Yi-Wen Liu, Yuan-Hao Howard Hsu.

**Investigation:** Wen-Hsin Wu, Ting-Yuan Wu, Yuan-Hao Howard Hsu.

**Methodology:** Yu-Jen Chao, Maria Balazova, Ting-Yuan Wu, Yi-Wen Liu, Yuan-Hao Howard Hsu.

**Project administration:** Wen-Hsin Wu, Yuan-Hao Howard Hsu.

**Resources:** Maria Balazova, Jamie Lin, Yi-Wen Liu, Yuan-Hao Howard Hsu.

**Software:** Yuan-Hao Howard Hsu.

**Supervision:** Yi-Wen Liu, Yuan-Hao Howard Hsu.

**Validation:** Yu-Jen Chao, Yi-Wen Liu, Yuan-Hao Howard Hsu.

**Visualization:** Yu-Jen Chao, Wen-Hsin Wu, Yi-Wen Liu, Yuan-Hao Howard Hsu.

**Writing – original draft:** Yuan-Hao Howard Hsu.

**Writing – review & editing:** Yu-Jen Chao, Yi-Wen Liu, Yuan-Hao Howard Hsu.

## References

1. Lieschke GJ, Currie PD. Animal models of human disease: zebrafish swim into view. *Nature reviews Genetics*. 2007; 8(5):353–67. <https://doi.org/10.1038/nrg2091> PMID: 17440532.



2. Santoriello C, Zon LI. Hooked! Modeling human disease in zebrafish. *The Journal of clinical investigation*. 2012; 122(7):2337–43. <https://doi.org/10.1172/JCI60434> PMID: 22751109.
3. Steele SL, Prykhozhiy SV, Berman JN. Zebrafish as a model system for mitochondrial biology and diseases. *Transl Res*. 2014; 163(2):79–98. <https://doi.org/10.1016/j.trsl.2013.08.008> PMID: 24055494
4. Khuchua Z, Yue Z, Batts L, Strauss AW. A zebrafish model of human Barth syndrome reveals the essential role of tafazzin in cardiac development and function. *Circulation Research*. 2006; 99(2):201–8. <https://doi.org/10.1161/01.RES.0000233378.95325.ce> PMID: 16794186
5. Sheng DL, Qu DB, Kwok KHH, Ng SS, Lim AYM, Aw SS, et al. Deletion of the WD40 Domain of LRRK2 in Zebrafish Causes Parkinsonism-Like Loss of Neurons and Locomotive Defect. *Plos Genetics*. 2010; 6(4):e1000914. <https://doi.org/10.1371/journal.pgen.1000914> PMID: 20421934
6. Baden KN, Murray J, Capaldi RA, Guillemin K. Early developmental pathology due to cytochrome c oxidase deficiency is revealed by a new zebrafish model. *Journal of Biological Chemistry*. 2007; 282(48):34839–49. <https://doi.org/10.1074/jbc.M703528200> PMID: 17761683
7. Ramesh T, Lyon AN, Pineda RH, Wang CP, Janssen PML, Canan BD, et al. A genetic model of amyotrophic lateral sclerosis in zebrafish displays phenotypic hallmarks of motoneuron disease. *Disease Models & Mechanisms*. 2010; 3(9–10):652–62.
8. Shah DI, Takahashi-Makise N, Cooney JD, Li LT, Schultz IJ, Pierce EL, et al. Mitochondrial Atp1f1 regulates haem synthesis in developing erythroblasts. *Nature*. 2012; 491(7425):608–12. <https://doi.org/10.1038/nature11536> PMID: 23135403
9. Fraher D, Sanigorski A, Mellett NA, Meikle PJ, Sinclair AJ, Gibert Y. Zebrafish Embryonic Lipidomic Analysis Reveals that the Yolk Cell Is Metabolically Active in Processing Lipid. *Cell Rep*. 2016; 14(6):1317–29. <https://doi.org/10.1016/j.celrep.2016.01.016> PMID: 26854233
10. Betancor MB, Almáida-Pagan PF, Hernandez A, Tocher DR. Effects of dietary fatty acids on mitochondrial phospholipid compositions, oxidative status and mitochondrial gene expression of zebrafish at different ages. *Fish Physiol Biochem*. 41(5):1187–204. Epub 2015/07/15. <https://doi.org/10.1007/s10695-015-0079-0> PMID: 26156499.
11. Almáida-Pagan PF, De Santis C, Rubio-Mejía OL, Tocher DR. Dietary fatty acids affect mitochondrial phospholipid compositions and mitochondrial gene expression of rainbow trout liver at different ages. *J Comp Physiol B*. 185(1):73–86. Epub 2014/11/16. <https://doi.org/10.1007/s00360-014-0870-8> PMID: 25398637.
12. Otles S, Pire R. Fatty acid composition of Chlorella and Spirulina microalgae species. *J Aoac Int*. 2001; 84(6):1708–14. PMID: 11767135
13. Cha KH, Koo SY, Lee DU. Antiproliferative Effects of Carotenoids Extracted from Chlorella ellipsoidea and Chlorella vulgaris on Human Colon Cancer Cells. *J Agr Food Chem*. 2008; 56(22):10521–6. <https://doi.org/10.1021/jf802111x> PMID: 18942838
14. Wang HM, Pan JL, Chen CY, Chiu CC, Yang MH, Chang HW, et al. Identification of anti-lung cancer extract from Chlorella vulgaris C-C by antioxidant property using supercritical carbon dioxide extraction. *Process Biochem*. 2010; 45(12):1865–72. <https://doi.org/10.1016/j.procbio.2010.05.023>
15. Konishi F, Tanaka K, Himeno K, Taniguchi K, Nomoto K. Antitumor Effect Induced by a Hot Water Extract of Chlorella-Vulgaris (Ce)—Resistance to Meth-a Tumor-Growth Mediated by Ce-Induced Polymorphonuclear Leukocytes. *Cancer Immunol Immun*. 1985; 19(2):73–8.
16. Grammes F, Reveco FE, Romarheim OH, Landsverk T, Mydland LT, Overland M. Candida utilis and Chlorella vulgaris Counteract Intestinal Inflammation in Atlantic Salmon (*Salmo salar* L.). *Plos One*. 2013; 8(12). <https://doi.org/10.1371/journal.pone.0083213> PMID: 24386162
17. Soontornchaiboon W, Joo SS, Kim SM. Anti-inflammatory Effects of Violaxanthin Isolated from Microalga Chlorella ellipsoidea in RAW 264.7 Macrophages. *Biol Pharm Bull*. 2012; 35(7):1137–44. PMID: 22791163
18. Kralovec JA, Power MR, Liu F, Maydanski E, Ewart HS, Watson LV, et al. An aqueous Chlorella extract inhibits IL-5 production by mast cells in vitro and reduces ovalbumin-induced eosinophil infiltration in the airway in mice in vivo. *Int Immunopharmacol*. 2005; 5(4):689–98. <https://doi.org/10.1016/j.intimp.2004.11.016> PMID: 15710338
19. Ting HC, Chao YJ, Hsu YHH. Polyunsaturated fatty acids incorporation into cardiolipin in H9c2 cardiac myoblast. *J Nutr Biochem*. 2015; 26(7):769–75. <https://doi.org/10.1016/j.jnutbio.2015.02.005> PMID: 25866137
20. Chao YJ, Chang WH, Ting HC, Chao WT, Hsu YHH. Cell Cycle Arrest and Cell Survival Induce Reverse Trends of Cardiolipin Remodeling. *Plos One*. 2014; 9(11). <https://doi.org/10.1371/journal.pone.0113680> PMID: 25422939
21. Brand MD, Nicholls DG. Assessing mitochondrial dysfunction in cells. *Biochem J*. 2011; 435:297–312. <https://doi.org/10.1042/BJ20110162> PMID: 21726199

22. Paumard P, Vaillier J, Couлары B, Schaeffer J, Soubannier V, Mueller DM, et al. The ATP synthase is involved in generating mitochondrial cristae morphology. *Embo J*. 2002; 21(3):221–30. <https://doi.org/10.1093/emboj/21.3.221> PMID: 11823415
23. Paradies G, Paradies V, De Benedictis V, Ruggiero FM, Petrosillo G. Functional role of cardiolipin in mitochondrial bioenergetics. *Bba-Bioenergetics*. 2014; 1837(4):408–17. <https://doi.org/10.1016/j.bbabi.2013.10.006> PMID: 24183692
24. Paradies G, Petrosillo G, Pistolese M, Ruggiero FM. Reactive oxygen species affect mitochondrial electron transport complex I activity through oxidative cardiolipin damage. *Gene*. 2002; 286(1):135–41. [https://doi.org/10.1016/S0378-1119\(01\)00814-9](https://doi.org/10.1016/S0378-1119(01)00814-9) PMID: 11943469
25. Paradies G, Petrosillo G, Pistolese M, Ruggiero FM. Reactive oxygen species generated by the mitochondrial respiratory chain affect the complex III activity via cardiolipin peroxidation in beef-heart submitochondrial particles. *Mitochondrion*. 2001; 1(2):151–9. [https://doi.org/10.1016/S1567-7249\(01\)00011-3](https://doi.org/10.1016/S1567-7249(01)00011-3) PMID: 16120275
26. Paradies G, Petrosillo G, Pistolese M, Ruggiero FM. The effect of reactive oxygen species generated from the mitochondrial electron transport chain on the cytochrome c oxidase activity and on the cardiolipin content in bovine heart submitochondrial particles. *Febs Lett*. 2000; 466(2–3):323–6. [https://doi.org/10.1016/S0014-5793\(00\)01082-6](https://doi.org/10.1016/S0014-5793(00)01082-6) PMID: 10682852
27. Houtkooper RH, Rodenburg RJ, Thiels C, van Lenthe H, Stet F, Bwee TPT, et al. Cardiolipin and monolysocardiolipin analysis in fibroblasts, lymphocytes, and tissues using high-performance liquid chromatography-mass spectrometry as a diagnostic test for Barth syndrome. *Anal Biochem*. 2009; 387(2):230–7. <https://doi.org/10.1016/j.ab.2009.01.032> PMID: 19454236
28. Kind T, Liu KH, Lee DY, DeFelice B, Meissen JK, Fiehn O. LipidBlast in silico tandem mass spectrometry database for lipid identification. *Nat Methods*. 2013; 10(8):755–+. <https://doi.org/10.1038/nmeth.2551> PMID: 23817071
29. Khuchua Z, Yue Z, Strauss AW. Zebrafish (*Danio rerio*) model of Barth syndrome. *Circulation*. 2004; 110(17):46–.
30. Wang CY, Faloon PW, Tan ZJ, Lv YX, Zhang PB, Ge Y, et al. Mouse lysocardiolipin acyltransferase controls the development of hematopoietic and endothelial lineages during in vitro embryonic stem-cell differentiation. *Blood*. 2007; 110(10):3601–9. <https://doi.org/10.1182/blood-2007-04-086827> PMID: 17675553
31. Xiong JW, Wang C, Yu O, Zhang J, Deng H. An acyltransferase controls the generation of hematopoietic and endothelial lineages in zebrafish and mouse ES cells. *Circulation*. 2007; 116(16):71–.
32. Westerfield M. The zebrafish book: a guide for the laboratory use of zebrafish (*Brachydanio rerio*). [Eugene, OR]: M. Westerfield; 1993. 1 v. (unpaged) p.
33. Bligh EG, Dyer WJ. A rapid method of total lipid extraction and purification. *Can J Biochem Physiol*. 1959; 37(8):911–7. <https://doi.org/10.1139/o59-099> PMID: 13671378.
34. Bird SS, Marur VR, Sniatynski MJ, Greenberg HK, Kristal BS. Lipidomics profiling by high-resolution LC-MS and high-energy collisional dissociation fragmentation: focus on characterization of mitochondrial cardiolipins and monolysocardiolipins. *Analytical chemistry*. 2011; 83(3):940–9. <https://doi.org/10.1021/ac102598u> PMID: 21192696.
35. Ostrander DB, Sparagna GC, Amoscato AA, McMillin JB, Dowhan W. Decreased cardiolipin synthesis corresponds with cytochrome c release in palmitate-induced cardiomyocyte apoptosis. *The Journal of biological chemistry*. 2001; 276(41):38061–7. <https://doi.org/10.1074/jbc.M107067200> PMID: 11500520.
36. Sparagna GC, Hickson-Bick DL, Buja LM, McMillin JB. A metabolic role for mitochondria in palmitate-induced cardiac myocyte apoptosis. *Am J Physiol Heart Circ Physiol*. 2000; 279(5):H2124–32. <https://doi.org/10.1152/ajpheart.2000.279.5.H2124> PMID: 11045945.
37. Ting HC, Chao YJ, Hsu YH. Polyunsaturated fatty acids incorporation into cardiolipin in H9c2 cardiac myoblast. *J Nutr Biochem*. 2015; 26(7):769–75. <https://doi.org/10.1016/j.jnutbio.2015.02.005> PMID: 25866137.
38. Khairallah RJ, Sparagna GC, Khanna N, O'Shea KM, Hecker PA, Kristian T, et al. Dietary supplementation with docosahexaenoic acid, but not eicosapentaenoic acid, dramatically alters cardiac mitochondrial phospholipid fatty acid composition and prevents permeability transition. *Biochimica et biophysica acta*. 2010; 1797(8):1555–62. <https://doi.org/10.1016/j.bbabi.2010.05.007> PMID: 20471951.
39. Bowron A, Honeychurch J, Williams M, Tsai-Goodman B, Clayton N, Jones L, et al. Barth syndrome without tetralinoleoyl cardiolipin deficiency: a possible ameliorated phenotype. *J Inherit Metab Dis*. 2015; 38(2):279–86. <https://doi.org/10.1007/s10545-014-9747-y> PMID: 25112388.
40. Xu Y, Phoon CK, Berno B, D'Souza K, Hoedt E, Zhang G, et al. Loss of protein association causes cardiolipin degradation in Barth syndrome. *Nature chemical biology*. 2016; 12(8):641–7. <https://doi.org/10.1038/nchembio.2113> PMID: 27348092.

41. Acehan D, Vaz F, Houtkooper RH, James J, Moore V, Tokunaga C, et al. Cardiac and skeletal muscle defects in a mouse model of human Barth syndrome. *The Journal of biological chemistry*. 2011; 286(2):899–908. <https://doi.org/10.1074/jbc.M110.171439> PMID: 21068380.
42. Acehan D, Khuchua Z, Houtkooper RH, Malhotra A, Kaufman J, Vaz FM, et al. Distinct effects of tafazzin deletion in differentiated and undifferentiated mitochondria. *Mitochondrion*. 2009; 9(2):86–95. <https://doi.org/10.1016/j.mito.2008.12.001> PMID: 19114128.
43. Acehan D, Malhotra A, Xu Y, Ren M, Stokes DL, Schlame M. Cardiolipin affects the supramolecular organization of ATP synthase in mitochondria. *Biophysical journal*. 2011; 100(9):2184–92. <https://doi.org/10.1016/j.bpj.2011.03.031> PMID: 21539786.
44. Cao J, Liu Y, Lockwood J, Burn P, Shi Y. A novel cardiolipin-remodeling pathway revealed by a gene encoding an endoplasmic reticulum-associated acyl-CoA:lysocardiolipin acyltransferase (ALCAT1) in mouse. *The Journal of biological chemistry*. 2004; 279(30):31727–34. <https://doi.org/10.1074/jbc.M402930200> PMID: 15152008.
45. Xiong JW, Yu Q, Zhang J, Mably JD. An acyltransferase controls the generation of hematopoietic and endothelial lineages in zebrafish. *Circulation research*. 2008; 102(9):1057–64. <https://doi.org/10.1161/CIRCRESAHA.107.163907> PMID: 18388326.
46. Lesnefsky EJ, Hoppel CL. Cardiolipin as an oxidative target in cardiac mitochondria in the aged rat. *Bba-Bioenergetics*. 2008; 1777(7–8):1020–7. <https://doi.org/10.1016/j.bbabi.2008.05.444> PMID: 18515061
47. Lesnefsky EJ, Minkler P, Hoppel CL. Enhanced modification of cardiolipin during ischemia in the aged heart. *J Mol Cell Cardiol*. 2009; 46(6):1008–15. PMID: 19303420
